# Supplementary material
Source: publisher figshare collection journal article supplement (https://karger.figshare.com/ndownloader/files/14425316)
Supplement: Supplementary file 1 [file 14425316]

Supplementary figure I. Flowchart for inclusion of patients in the study.

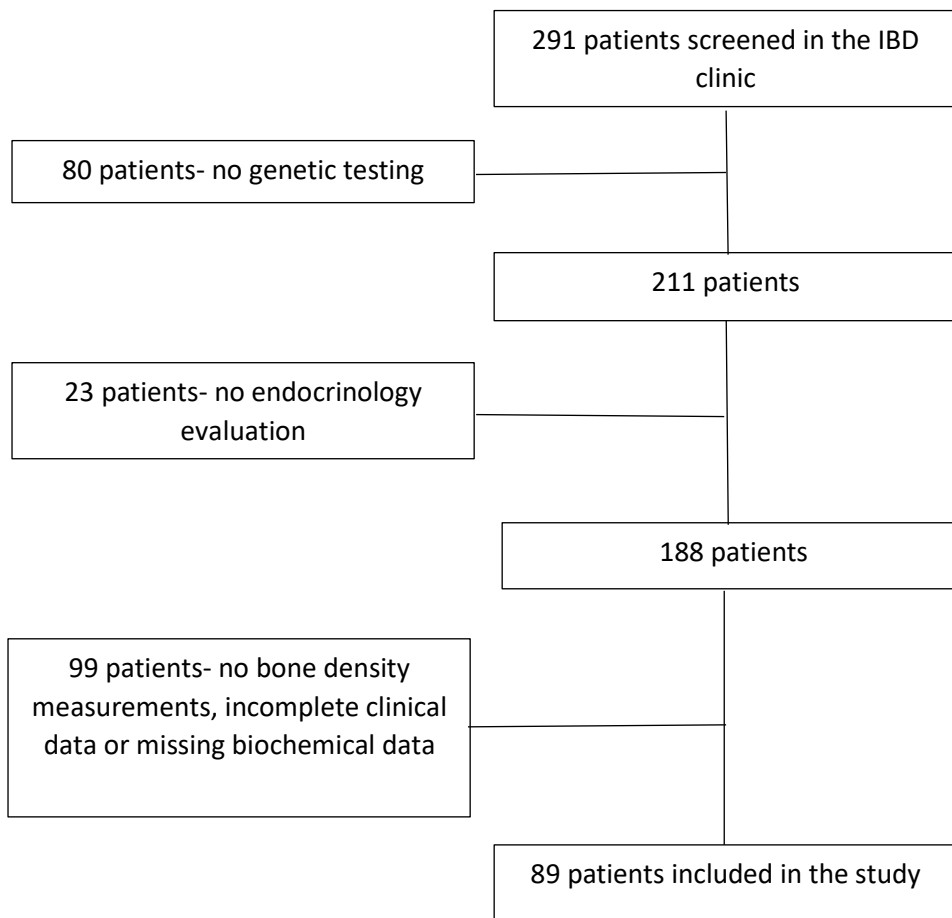

Supplementary table I. Multivariate analysis

| Variable                                          | R <sup>2</sup> | P-value |
|---------------------------------------------------|----------------|---------|
| BMI                                               | 0.1            | 0.008   |
| Gender (M/F)                                      | 0.14           | 0.07    |
| 25OHD (sufficient/insufficient, cut-off 20 ng/ml) | 0.162          | 0.16    |
| Disease type (CD/UC)                              | 0.17           | 0.42    |
| Glucocorticoids ever (Y/N)                        | 0.18           | 0.47    |
| Any mutation in NOD2 (Y/N)                        | 0.183          | 0.62    |
| Current smoker (Y/N)                              | 0.185          | 0.66    |

\*R<sup>2</sup> and P-value were calculated using the linear regression model.

Supplementary table II. Multivariate analysis

| Variable                                          | R <sup>2</sup> | P-value |
|---------------------------------------------------|----------------|---------|
| Glucocorticoids ever (Y/N)                        | 0.05           | 0.03    |
| Gender (M/F)                                      | 0.08           | 0.07    |
| Current smoker (Y/N)                              | 0.11           | 0.1     |
| Disease type (CD/UC)                              | 0.116          | 0.47    |
| BMI                                               | 0.12           | 0.57    |
| 25OHD (sufficient/insufficient, cut-off 20 ng/ml) | 0.121          | 0.7     |
| Any mutation in NOD2 (Y/N)                        | 0.122          | 0.75    |

\*R<sup>2</sup> and P-values were calculated using logistic regression model.
